# Supplementary material for: Tunable emission of Li4SrCaSi2O4−yN2y/3:Eu2+ phosphors based on anion substitution induction for WLEDs and optical thermometry
Source: Royal Society of Chemistry journal article supplement (doi:10.1039/d2dt00485b), 2022-01-01
Supplement: d2dt00485b1.pdf [file d2dt00485b1.pdf]

# Tunable emission of $\text{Li}_4\text{SrCaSi}_2\text{O}_{4-y}\text{N}_{2y/3}:\text{Eu}^{2+}$ phosphors based on anion substitution induction for WLEDs and optical thermometry

Hua Yu<sup>a,b</sup>, Liuyan Zhou<sup>b,c</sup>, Renguang Ye<sup>b,c</sup>, Degang Deng<sup>\*b,c</sup>, Shiqing Xu<sup>\*b,c</sup>

<sup>a</sup> Center for Advanced Optoelectronic Materials, College of Materials and Environmental Engineering, Hangzhou Dianzi University, Hangzhou 310018, China

<sup>b</sup> Key Laboratory of Rare Earth Optoelectronic Materials and Devices of Zhejiang Province, Institute of Optoelectronic Materials and Devices, China Jiliang University, Hangzhou 310018, China

<sup>c</sup> Institute of Optoelectronic Materials and Devices, China Jiliang University, Hangzhou 310018, China

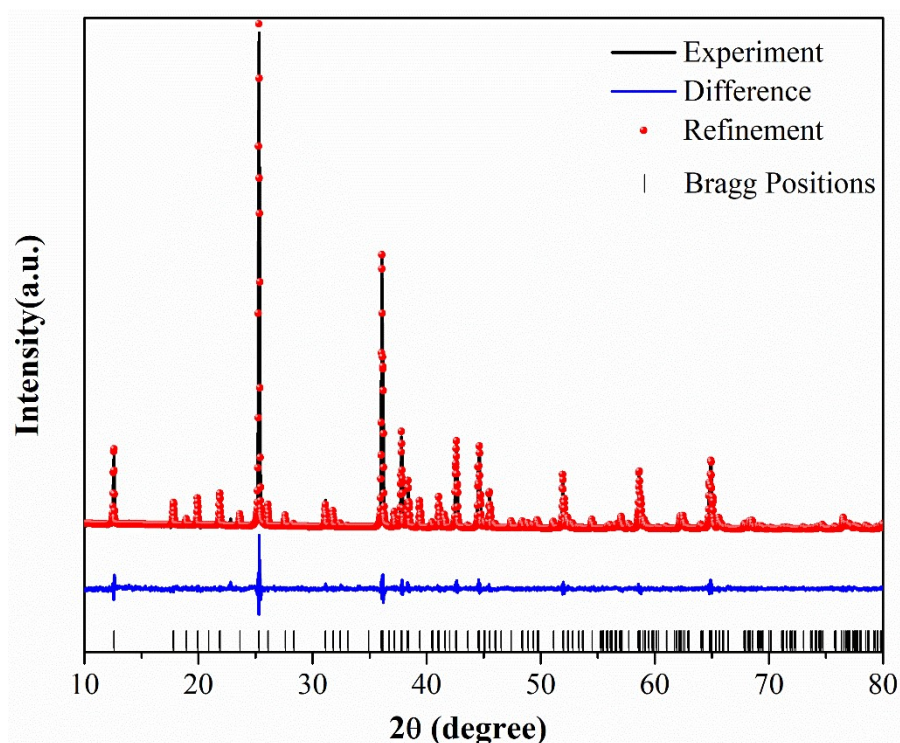

Figure S1 Rietveld refinement XRD patterns of  $\text{Li}_4\text{SrCaSi}_2\text{O}_4\text{N}_{8/3}$  (experiment: black line, difference: blue line, refinement: red ball and Bragg positions: black tick marks)

\* Corresponding author:

E-mail address: [dengdegang@cjl.u.edu.cn](mailto:dengdegang@cjl.u.edu.cn) (D. Deng), [shiqingxu75@163.com](mailto:shiqingxu75@163.com) (S. Xu).

Table S1 The refinement data and fractional atomic coordinates of  $\text{Li}_4\text{SrCaSi}_2\text{O}_4\text{N}_{8/3}$

---

**Space group: Pbcm (57) (orthorhombic)**

---

| <b>Cell parameter</b>                            | <b>Reliability Factors</b> |
|--------------------------------------------------|----------------------------|
| Crystal Density ( $\text{g}/\text{cm}^3$ )=9.005 | $R_{\text{exp}}(\%)=4.63$  |
| $Z=4$                                            | $R_{\text{wp}}(\%)=6.17$   |
| $a=4.98487 \text{ \AA}$                          | $R_{\text{p}}(\%)=5.32$    |
| $b=9.93483 \text{ \AA}$                          | $GOF=1.41$                 |
| $c=14.0471 \text{ \AA}$                          |                            |
| $V=696.9828 \text{ \AA}^3$                       |                            |

---

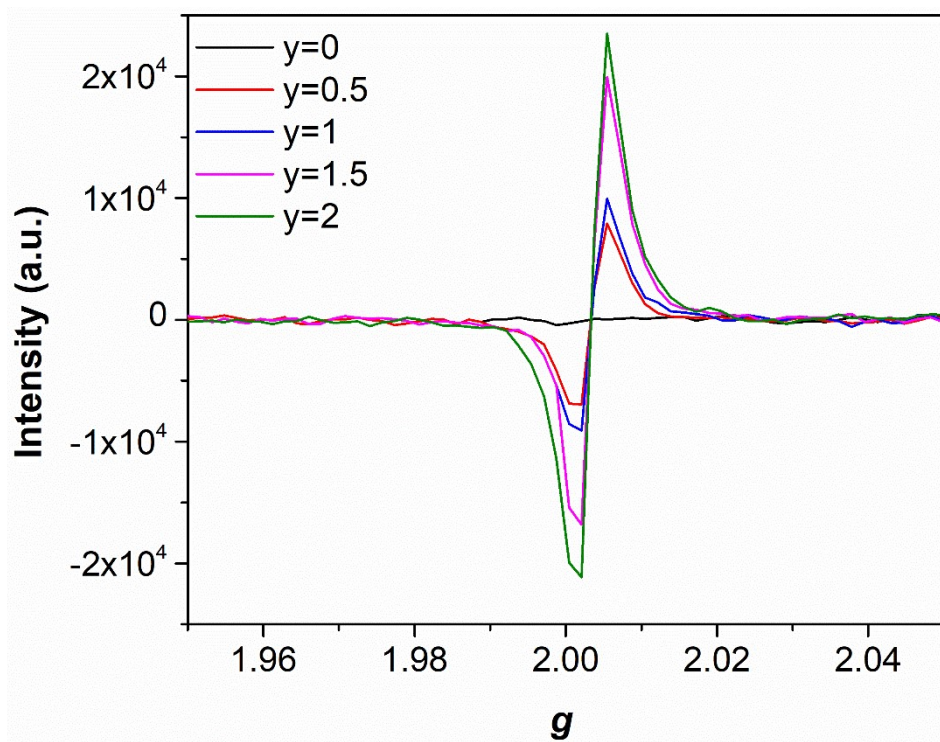

Figure S2 EPR signals of  $\text{Li}_4\text{SrCaSi}_2\text{O}_{8-2y}\text{N}_{4y/3}$  ( $y=0, 0.5, 1, 1.5$  and  $2$ ) (test temperature is 77K)

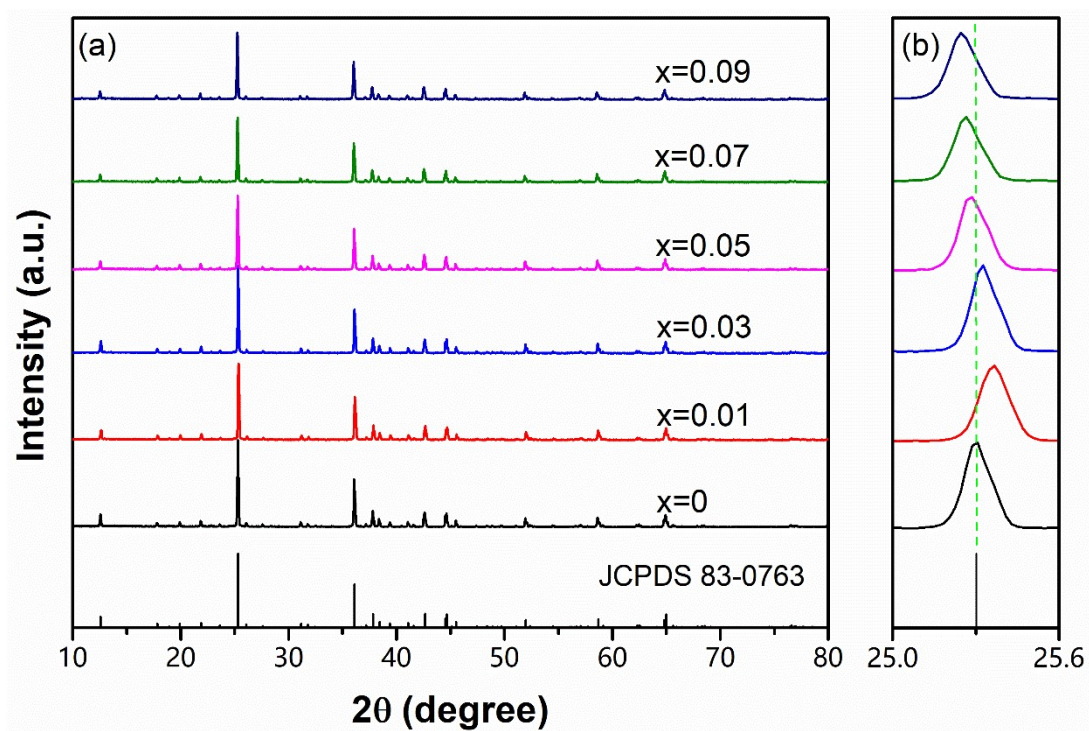

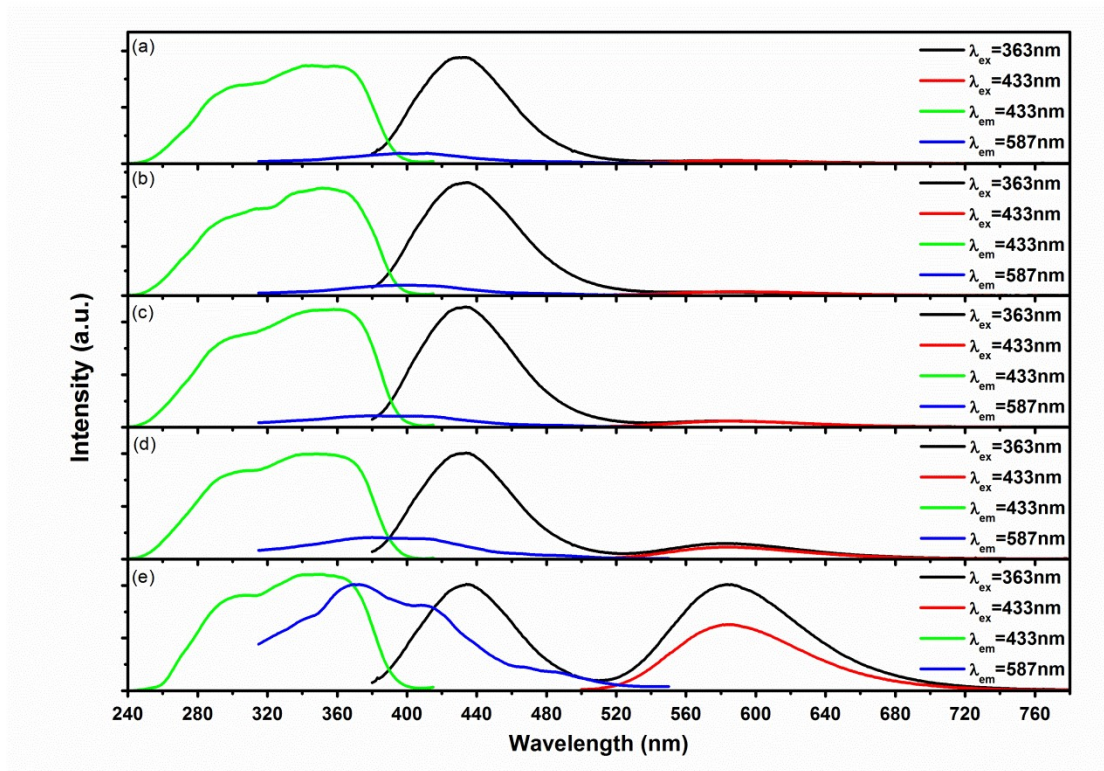

Figure S4 The excitation and emission spectra of the series of  $\text{Li}_4\text{SrCaSi}_2\text{O}_{8-2y}\text{N}_{4y/3}: 0.05\text{Eu}^{2+}$  samples with different  $\text{N}^{3-}$  content (a)  $y=0$ , (b)  $y=0.5$ , (c)  $y=1$ , (d)  $y=1.5$  and (e)  $y=2$ .

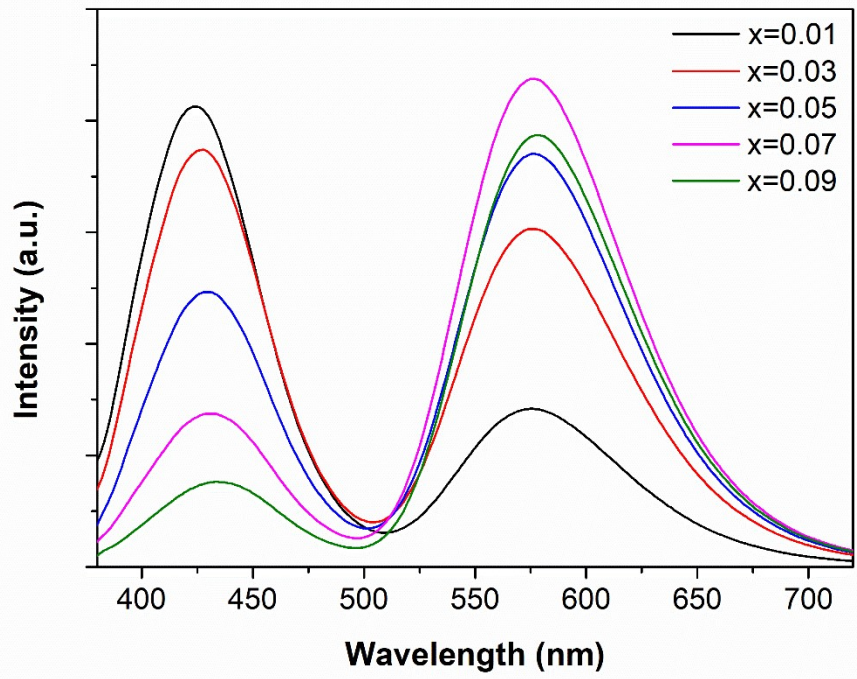

Figure S5 The emission spectra of the series of  $\text{Li}_4\text{SrCaSi}_2\text{O}_4\text{N}_{8/3}:\text{xEu}^{2+}$  samples (x=0.01, 0.03, 0.05, 0.07 and 0.09)

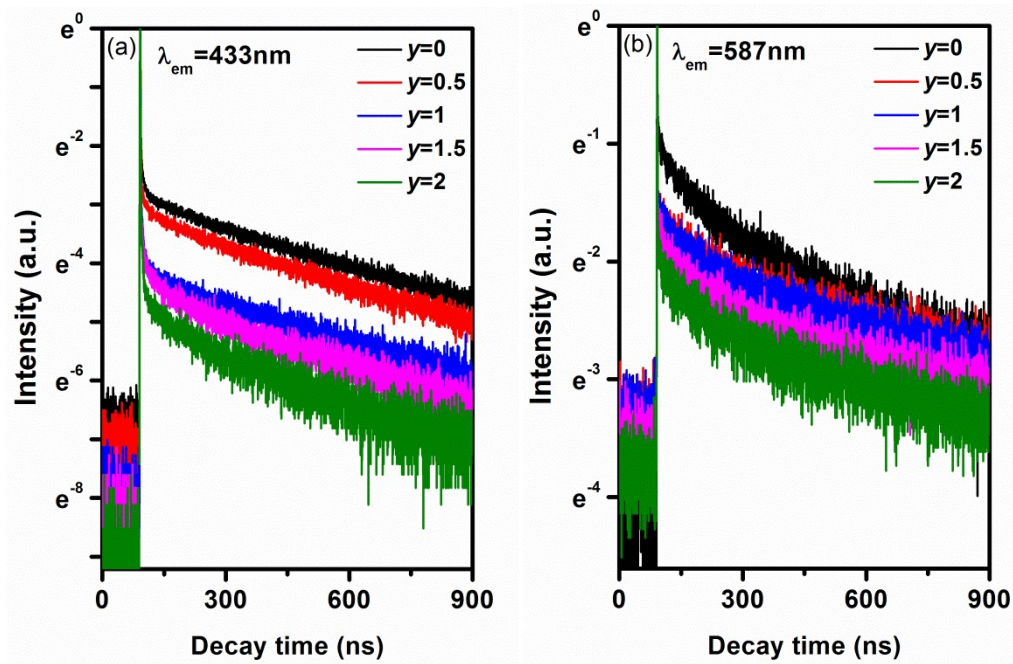

Figure S6 The decay curves of  $\text{Li}_4\text{SrCaSi}_2\text{O}_{8-2y}\text{N}_{4y/3}: 0.05\text{Eu}^{2+}$  ( $y=0, 0.5, 1, 1.5$  and  $2$ ) samples with the excitation at  $370\text{ nm}$  and monitored at (a)  $433\text{ nm}$  and (b)  $587\text{ nm}$

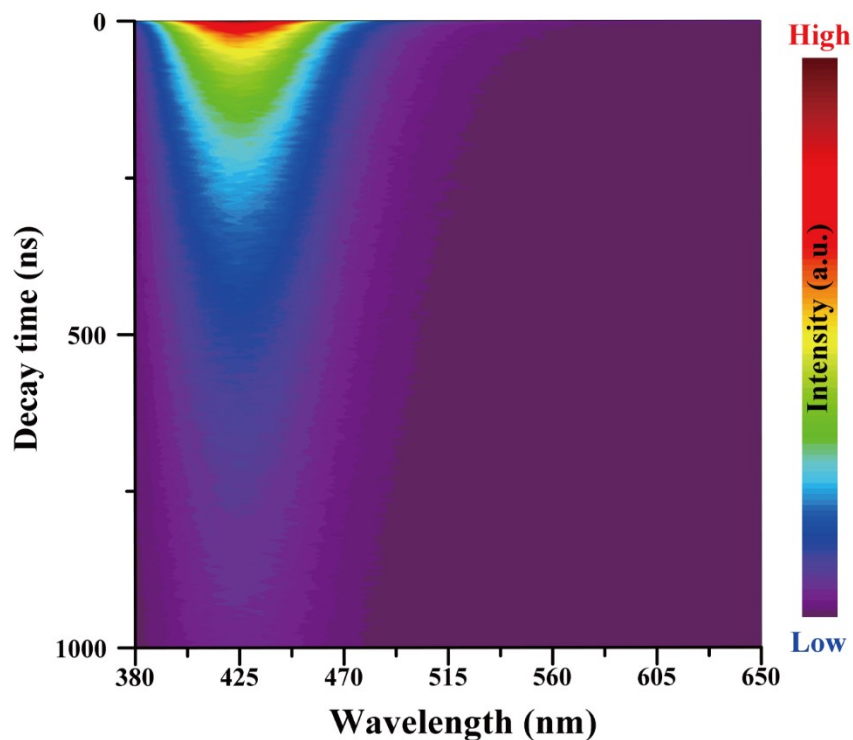

Fig. S6 (c) Time-resolved emission spectra (TRES) of  $\text{Li}_4\text{SrCa}(\text{SiO}_4)_2: 0.05\text{Eu}^{2+}$  under  $370\text{ nm}$  excitation at room temperature

The decay curves of  $\text{Li}_4\text{SrCaSi}_2\text{O}_{8-2y}\text{N}_{4y/3}: 0.05\text{Eu}^{2+}$  ( $y=0, 0.5, 1, 1.5$  and  $2$ ) samples with the excitation at  $370\text{ nm}$  and monitored at  $433\text{ nm}$  and  $587\text{ nm}$  have been shown in Figure S6. It is obvious that the curves can be well fitted by a second-order exponential curve by the

biexponential formula:

$$I(t) = A + A_1 \exp\left(-\frac{t}{\tau_1}\right) + A_2 \exp\left(-\frac{t}{\tau_2}\right) \quad (\text{S1})$$

where  $I$  is the luminescent intensity,  $A_1$  and  $A_2$  are fitting constants,  $t$  is the time,  $\tau_1$  and  $\tau_2$  are short and long lifetimes for exponential components, respectively. Therefore, the average lifetimes ( $\tau^*$ ) of  $\text{Li}_4\text{SrCaSi}_2\text{O}_{8-2y}\text{N}_{4y/3}: 0.05\text{Eu}^{2+}$  ( $y=0, 0.5, 1, 1.5$  and  $2$ ) samples can be calculated by the following formula:

$$\tau^* = \frac{A_1 \tau_1^2 + A_2 \tau_2^2}{A_1 \tau_1 + A_2 \tau_2} \quad (\text{S2})$$

and the related parameters and average lifetime values listed in Table S2.

Table S2 the related parameters and average lifetime values

|       | 433nm |          |       |          |                     | 587nm |          |       |          |                     |
|-------|-------|----------|-------|----------|---------------------|-------|----------|-------|----------|---------------------|
|       | $A_1$ | $\tau_1$ | $A_2$ | $\tau_2$ | $\tau^*(\text{ns})$ | $A_1$ | $\tau_1$ | $A_2$ | $\tau_2$ | $\tau^*(\text{ns})$ |
| y=0   | 0.50  | 5.03     | 0.36  | 329.60   | 322.80              | 0.21  | 22.79    | 0.47  | 272.51   | 263.37              |
| y=0.5 | 0.40  | 6.01     | 0.42  | 306.50   | 300.97              | 0.23  | 48.67    | 0.48  | 434.29   | 414.57              |
| y=1   | 0.60  | 3.96     | 0.18  | 304.72   | 292.36              | 0.25  | 39.07    | 0.45  | 364.58   | 346.53              |
| y=1.5 | 0.58  | 4.64     | 0.20  | 208.59   | 196.02              | 0.23  | 22.55    | 0.42  | 280.76   | 269.86              |
| y=2   | 0.64  | 3.42     | 0.15  | 191.44   | 178.28              | 0.23  | 18.55    | 0.40  | 279.23   | 269.83              |



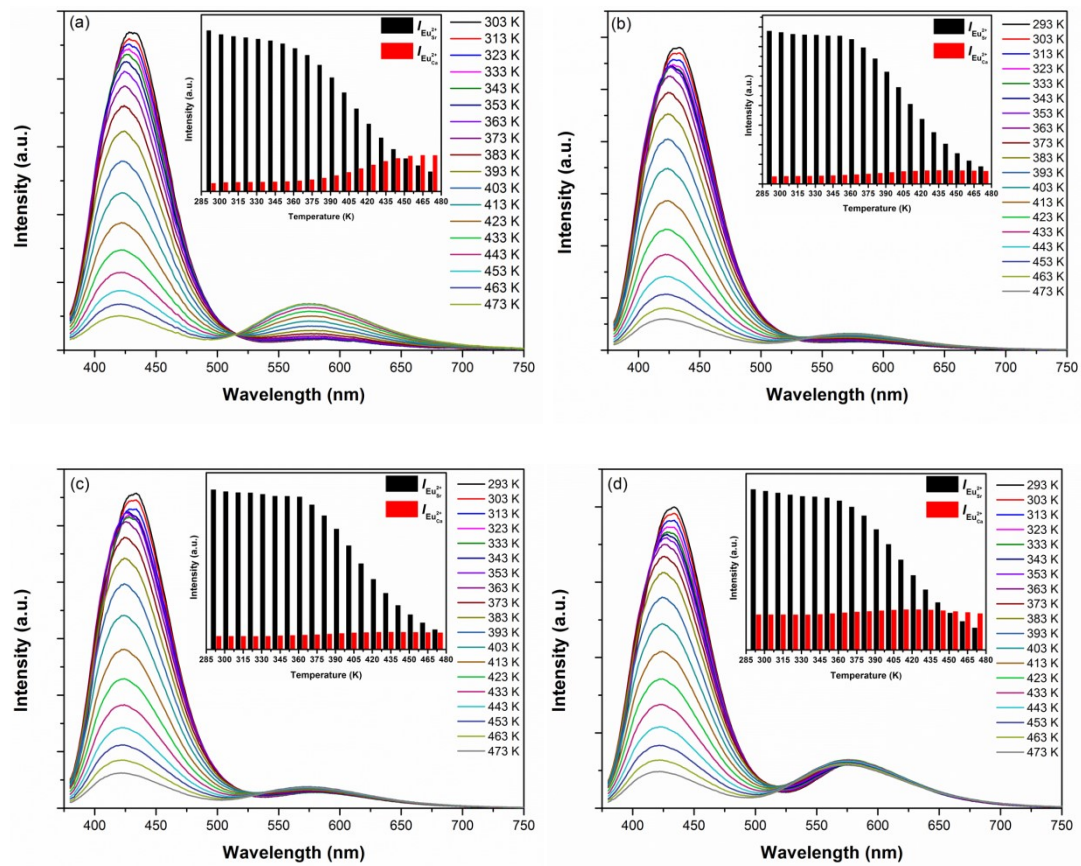

Figure S7 The temperature-dependent (273 ~ 473 K) photoluminescence spectra of  $\text{Li}_4\text{SrCaSi}_2\text{O}_{8.2y}\text{N}_{4y/3} : 0.05\text{Eu}^{2+}$  phosphors, (a)  $y=0$ , (b)  $y=0.5$ , (c)  $y=1$  and (d)  $y=1.5$ ; the inset shows the Histogram displaying the integrated emission intensity of  $\text{Eu}_{\text{Sr}}^{2+}$  and  $\text{Eu}_{\text{Ca}}^{2+}$  at various temperatures

Exhaustive inference for Equation (1):

The fluorescence lifetime follows the classical Mott–Seitz model which describes the total transition probability of an emitting level by the sum of radiative and nonradiative transition probabilities ( $A_R$  and  $A_{NR}$ , respectively). This can be evaluated by the inverse of the lifetime  $\tau$  of the emitting level:

$$\frac{1}{\tau} = \frac{1}{\tau_R} + \frac{1}{\tau_{NR}} \quad (\text{S3})$$

where  $\tau_R$  is the radiative lifetime (assumed to be temperature independent and equal to  $\tau_0$ , the lifetime intensity at  $T=0$  K) and  $\tau_{NR}$  is the nonradiative lifetime that is described by the Arrhenius dependence:  $\tau_{NR} = \tau_{NR}(0) \exp(-\Delta E/k_B T)$  where  $\tau_{NR}$  stands for the nonradiative decay time at  $T=0$  K and  $\Delta E$  for the activation energy of the thermal quenching process,  $k_B$  is the Boltzmann constant. Solving Eq. (3), we can write:

$$\tau = \frac{\tau_0}{1 + \alpha \exp(-\Delta E/k_B T)} \quad (\text{S4})$$

where  $\alpha = A_{NR}/A_R$ . When more than one quenching process is present, the above expression should be generalized including the deactivation through all the channels:

$$\tau = \frac{\tau_0}{1 + \sum_i \alpha_i \exp(-\Delta E_i/k_B T)} \quad (\text{S5})$$

The integrated luminescence intensity,  $I$ , may be related with  $\tau$  as:

$$\frac{I_T}{I_0} = \frac{\tau}{\tau_0} \quad (\text{S6})$$

where  $I_0$  is the emission intensity at  $T=0$  K. Combining Eqs. (5) and (6) it follows:

$$I = \frac{I_0}{1 + \sum_i \alpha_i \exp(-\Delta E_i/k_B T)} \quad (\text{S7})$$

Here, the value of activation energy ( $\Delta E_i$ ) is a key parameter of thermal quenching effect, which is the quenching activation energy from the intersection of the excited state and the ground state to the bottom of the excited state.

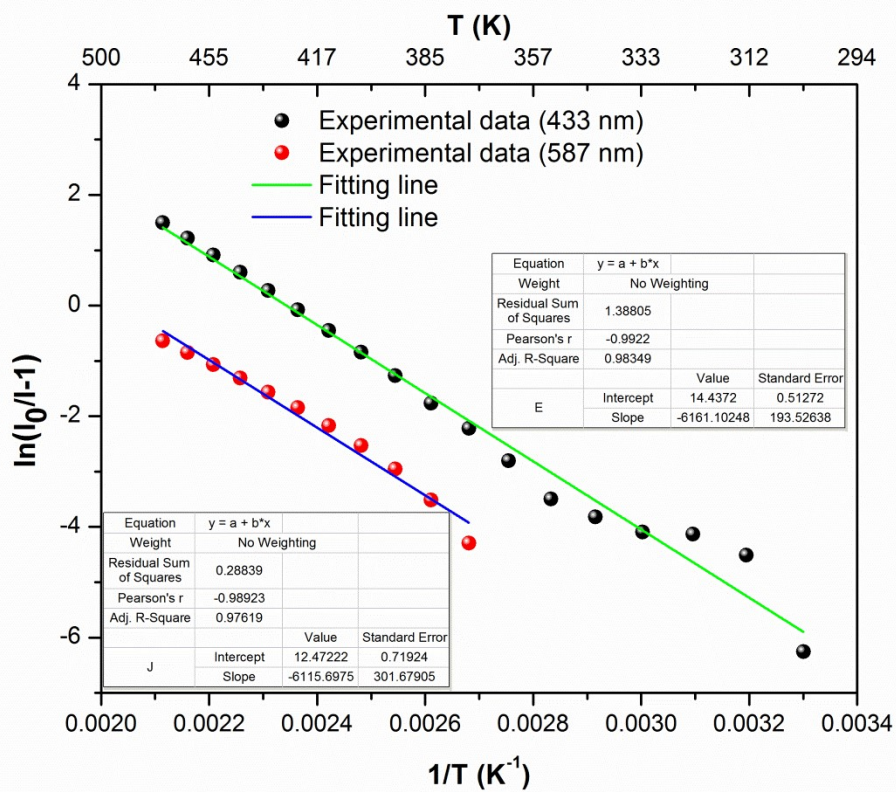

Figure S8 the  $\ln(I_0/I-1)$  vs  $1/T$  lines for two emission bands centered at 433 and 587nm in  $\text{Li}_4\text{SrCaSi}_2\text{O}_4\text{N}_{8/3}:\text{Eu}^{2+}$  phosphor

Exhaustive inference for Equation (2):

The relationship between the temperature ( $T$ ) and the total population of particles in the excited state is as follows:

$$N_T = N_1 + N_2 = \frac{N_0}{1 + A \exp(-\Delta E_1 / k_B T)} \quad (\text{S3})$$

where  $N_0$  is the total population at 0 K,  $N_1$  and  $N_2$  are the population at the excited states  $\text{Eu}_{Ca}^{2+}$  and  $\text{Eu}_{Sr}^{2+}$ , respectively,  $A$  is a pre-exponential constant, and  $\Delta E_1$  is the quenching activation energy, which is the energy difference between the bottom of the excited state  $\text{Eu}_{Ca}^{2+}$  (**b**) and the intersection (**d**) with the ground state. According to the above analysis, the thermally induced relaxation from the excited state  $\text{Eu}_{Sr}^{2+}$  to  $\text{Eu}_{Ca}^{2+}$  is through the paths  $\mathbf{a} \rightarrow \mathbf{c} \rightarrow \mathbf{b} \rightarrow \mathbf{d}$ , then the total population of the excited state  $\text{Eu}_{Sr}^{2+}$  can be expressed as follows:

$$N_2 = \left[ \frac{B_1}{1 + A' \exp(-\Delta E_0 / k_B T)} \right] \left[ \frac{N_0}{1 + A \exp(-\Delta E_1 / k_B T)} \right] \quad (\text{S4})$$

where  $B_1$  is related to the distribution probability from the excited state  $\text{Eu}_{Sr}^{2+}$  to  $\text{Eu}_{Ca}^{2+}$ ,  $A'$  is the exponential pre-constant of the excited state  $\text{Eu}_{Sr}^{2+}$ , and  $\Delta E_0$  is the quenching activation energy, which represents the distance from the bottom of the excited state  $\text{Eu}_{Sr}^{2+}$  (**a**) to the intersection (**c**) with the excited state  $\text{Eu}_{Ca}^{2+}$ . For the excited state  $\text{Eu}_{Ca}^{2+}$ , the population can be expressed as:

$$N_1 = N_T - N_2 = \left[ 1 - \frac{B_1}{1 + A' \exp(-\Delta E_0 / k_B T)} \right] \left[ \frac{N_0}{1 + A \exp(-\Delta E_1 / k_B T)} \right] \quad (\text{S5})$$

According to the above equations, the FIR parameter can be derived from the following equation:

$$FIR = \frac{I_{\text{Eu}_{Ca}^{2+}}}{I_{\text{Eu}_{Sr}^{2+}}} = \frac{N_1}{N_2} = \frac{1 - B_1 + A' \exp(-\Delta E_0 / k_B T)}{B_1} = D + C \exp(-\Delta E_0 / k_B T) \quad (\text{S6})$$

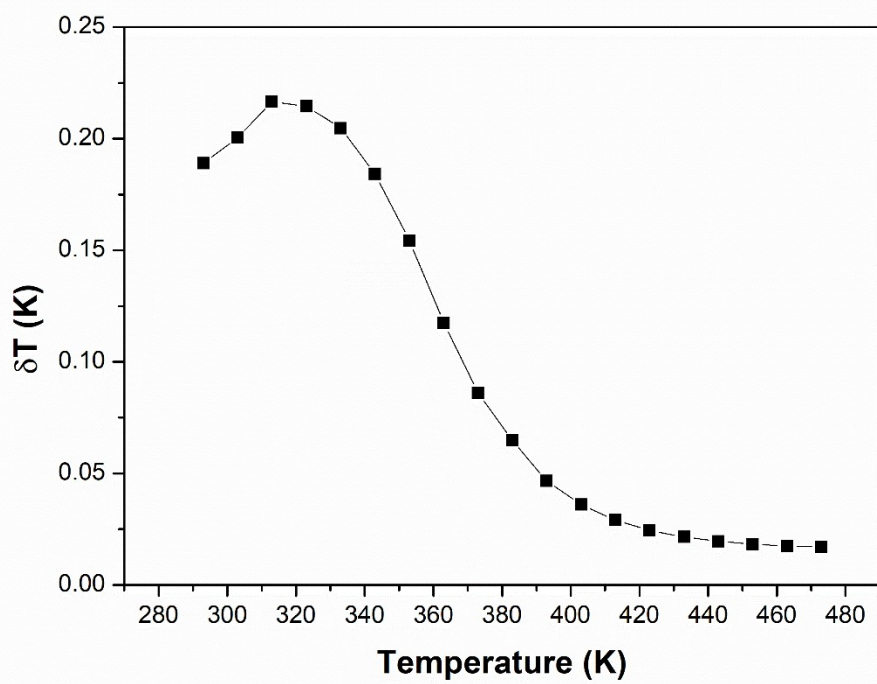

Figure S9 Temperature resolution  $\delta T$  in the temperature range from 293 to 473 K

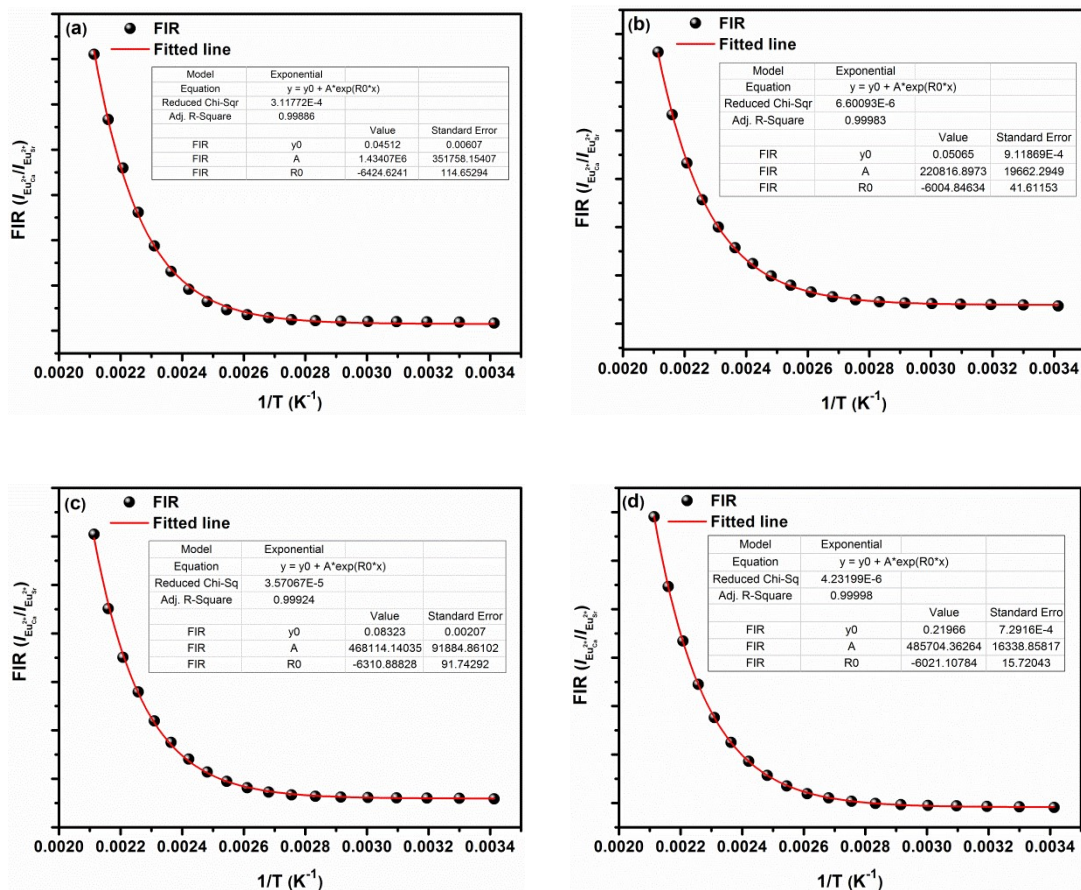

Figure S10 The FIR at different temperatures and the fitted results of  $\text{Li}_4\text{SrCaSi}_2\text{O}_{8-2y}\text{N}_{4y/3}$ :  $0.05\text{Eu}^{2+}$  phosphors, (a)  $y=0$ , (b)  $y=0.5$ , (c)  $y=1$  and (d)  $y=1.5$ .

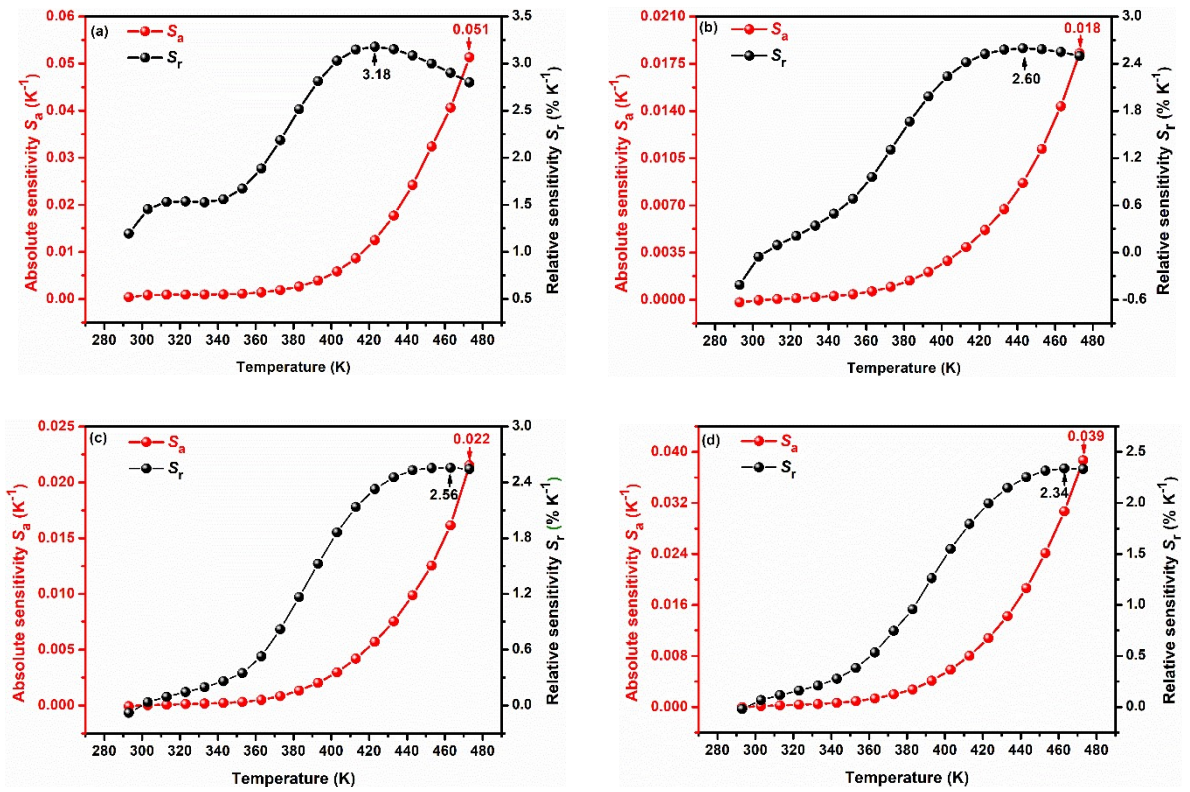

Figure S11 The absolute sensitivity  $S_a$  and relative sensitivity  $S_r$  of  $\text{Li}_4\text{SrCaSi}_2\text{O}_{8-2y}\text{N}_{4y/3}: 0.05\text{Eu}^{2+}$  phosphors, (a)  $y=0$ , (b)  $y=0.5$ , (c)  $y=1$  and (d)  $y=1.5$ .

Table S3 Optical thermometry parameters in  $\text{Li}_4\text{SrCaSi}_2\text{O}_{8-2y}\text{N}_{4y/3}: 0.05\text{Eu}^{2+}$  phosphors

|       | $\Delta E_0$<br>(eV) | Maximum $S_a$<br>(K <sup>-1</sup> ) | $T_{\text{max}}$<br>(K) | Maximum $S_r$<br>(% K <sup>-1</sup> ) | $T_{\text{max}}$<br>(K) |
|-------|----------------------|-------------------------------------|-------------------------|---------------------------------------|-------------------------|
| y=0   | 0.554                | 0.051                               | 473                     | 3.18                                  | 423                     |
| y=0.5 | 0.518                | 0.018                               | 473                     | 2.60                                  | 443                     |
| y=1   | 0.544                | 0.022                               | 473                     | 2.56                                  | 463                     |
| y=1.5 | 0.519                | 0.039                               | 473                     | 2.34                                  | 463                     |
| y=2   | 0.535                | 0.086                               | 473                     | 1.76                                  | 473                     |
